# Supplementary material
Source: PubMed Central journal article supplement (PMC6063368)
Supplement: NIHMS976848-supplement-Supplemental.pdf [file NIHMS976848-supplement-Supplemental.pdf]

## Supplementary Material

### An improved method for the purification of milk oligosaccharides by graphitised carbon-solid phase extraction

Randall C. Robinson, Emeline Colet, Tian Tian, Nina A. Poulsen, Daniela Barile

#### Contents

**Table S1.** *p*-Values from Tukey's post-hoc test for pairwise comparisons of OS and lactose abundances after washing the PGC SPE sorbent with water, 2%, 4%, 6%, or 8% acetonitrile

**Fig. S1.** LC-MS chromatogram of a bovine milk oligosaccharide sample.

**Table S1**

*p*-Values from Tukey's post-hoc test for pairwise comparisons of OS and lactose abundances after washing the PGC SPE sorbent with water, 2%, 4%, 6%, or 8% acetonitrile. <sup>a</sup>

| Compound           | 0% vs 2%             | 0% vs 4%             | 0% vs 6%             | 0% vs 8%             | 2% vs 4% | 2% vs 6%             | 2% vs 8%             | 4% vs 6%             | 4% vs 8%             | 6% vs 8% |
|--------------------|----------------------|----------------------|----------------------|----------------------|----------|----------------------|----------------------|----------------------|----------------------|----------|
| Acidic             |                      |                      |                      |                      |          |                      |                      |                      |                      |          |
| 1_1_0_1_0          | 0.002                | 0.004                | 0.098                | 0.006                | 0.492    | 0.0004               | 0.001                | 0.0008               | 0.002                | 0.086    |
| 2_0_0_1_0 (6'-SL)  | 2.2×10 <sup>-5</sup> | 1.2×10 <sup>-5</sup> | 0.0006               | 0.350                | 0.031    | 0.0006               | 3.2×10 <sup>-5</sup> | 0.0001               | 1.6×10 <sup>-5</sup> | 0.002    |
| 2_0_0_1_0 (3'-SL)  | 0.042                | 0.007                | 0.381                | 0.038                | 0.296    | 0.008                | 0.002                | 0.002                | 0.0006               | 0.278    |
| 2_0_0_2_0          | 0.001                | 3.4×10 <sup>-5</sup> | 0.004                | 0.997                | 0.0009   | 0.297                | 0.001                | 0.0003               | 3.7×10 <sup>-5</sup> | 0.005    |
| 2_0_0_0_1          | 0.0003               | 0.0001               | 0.206                | 0.058                | 0.110    | 0.001                | 8.4×10 <sup>-5</sup> | 0.0003               | 3.5×10 <sup>-5</sup> | 0.007    |
| 3_0_0_1_0          | 0.0003               | 0.0002               | 0.330                | 0.0008               | 0.371    | 0.0009               | 2×10 <sup>-5</sup>   | 0.0004               | 1.5×10 <sup>-5</sup> | 0.0004   |
| 3_1_0_1_0          | 0.002                | 0.005                | 0.002                | 0.195                | 0.414    | 0.998                | 0.009                | 0.546                | 0.040                | 0.011    |
| 4_2_0_1_0          | 0.592                | 0.020                | 0.030                | 0.328                | 0.078    | 0.126                | 0.965                | 0.986                | 0.146                | 0.240    |
| Neutral            |                      |                      |                      |                      |          |                      |                      |                      |                      |          |
| 2_1_0_0_0          | 0.106                | 0.999                | 0.002                | 0.0002               | 0.129    | 0.0004               | 6.6×10 <sup>-5</sup> | 0.001                | 0.0002               | 0.026    |
| 3_0_0_0_0 isomer 1 | 0.702                | 0.268                | 0.001                | 0.0003               | 0.071    | 0.0006               | 0.0002               | 0.004                | 0.0007               | 0.118    |
| 3_0_0_0_0 isomer 2 | 0.038                | 0.561                | 0.0002               | 4.9×10 <sup>-5</sup> | 0.179    | 0.001                | 0.0002               | 0.0004               | 7.8×10 <sup>-5</sup> | 0.038    |
| 3_1_0_0_0 isomer 1 | 0.0004               | 0.0004               | 0.002                | 10 <sup>-4</sup>     | 0.998    | 2.9×10 <sup>-5</sup> | 1.1×10 <sup>-5</sup> | 2.8×10 <sup>-5</sup> | 1.1×10 <sup>-5</sup> | 0.004    |
| 3_1_0_0_0 isomer 2 | 0.002                | 0.003                | 0.001                | 0.0006               | 0.988    | 0.756                | 0.232                | 0.530                | 0.144                | 0.709    |
| 3_1_0_0_0 isomer 3 | 0.0006               | 0.001                | 6.3×10 <sup>-5</sup> | 1.2×10 <sup>-5</sup> | 0.582    | 0.009                | 0.0001               | 0.003                | 7×10 <sup>-5</sup>   | 0.001    |
| 3_1_0_0_0 isomer 4 | 0.008                | 0.008                | 0.731                | 0.0002               | 0.046    | 0.001                | 0.073                | 0.021                | 0.003                | 0.0003   |
| 3_2_0_0_0          | 0.007                | 0.135                | 0.950                | 0.032                | 0.086    | 0.012                | 0.394                | 0.277                | 0.607                | 0.061    |
| 3_3_0_0_0          | 0.802                | 0.752                | 0.627                | 0.532                | 1.000    | 0.996                | 0.978                | 0.999                | 0.990                | 1.000    |
| 3_6_1_0_0          | 0.718                | 0.317                | 0.116                | 0.714                | 0.883    | 0.426                | 1                    | 0.856                | 0.886                | 0.429    |
| 4_1_0_0_0          | 0.072                | 0.031                | 0.012                | 0.006                | 0.886    | 0.347                | 0.142                | 0.758                | 0.361                | 0.899    |
| 4_5_1_0_0          | 0.020                | 0.275                | 0.154                | 0.969                | 0.177    | 0.314                | 0.033                | 0.977                | 0.500                | 0.288    |
| 5_4_1_0_0          | 0.004                | 0.006                | 0.009                | 0.688                | 0.978    | 0.823                | 0.011                | 0.982                | 0.016                | 0.025    |
| Summed OS          | 0.011                | 0.003                | 0.029                | 0.001                | 0.406    | 0.001                | 0.0001               | 0.0003               | 6.1×10 <sup>-5</sup> | 0.023    |
| Lactose            | 0.129                | 0.001                | 0.001                | 0.001                | 0.008    | 0.008                | 0.007                | 1.000                | 0.997                | 0.997    |

<sup>a</sup> All acetonitrile washes also contained 0.1% TFA. Oligosaccharides are represented by their monosaccharide compositions, denoted as

Hex\_HexNAc\_Fuc\_NeuAc\_NeuGc, with each number representing the quantity of the respective monosaccharide type. Hex: hexose, HexNAc: *N*-acetylhexosamine, Fuc: fucose, NeuAc: *N*-acetylneuraminic acid, NeuGc: *N*-glycolylneuraminic acid.

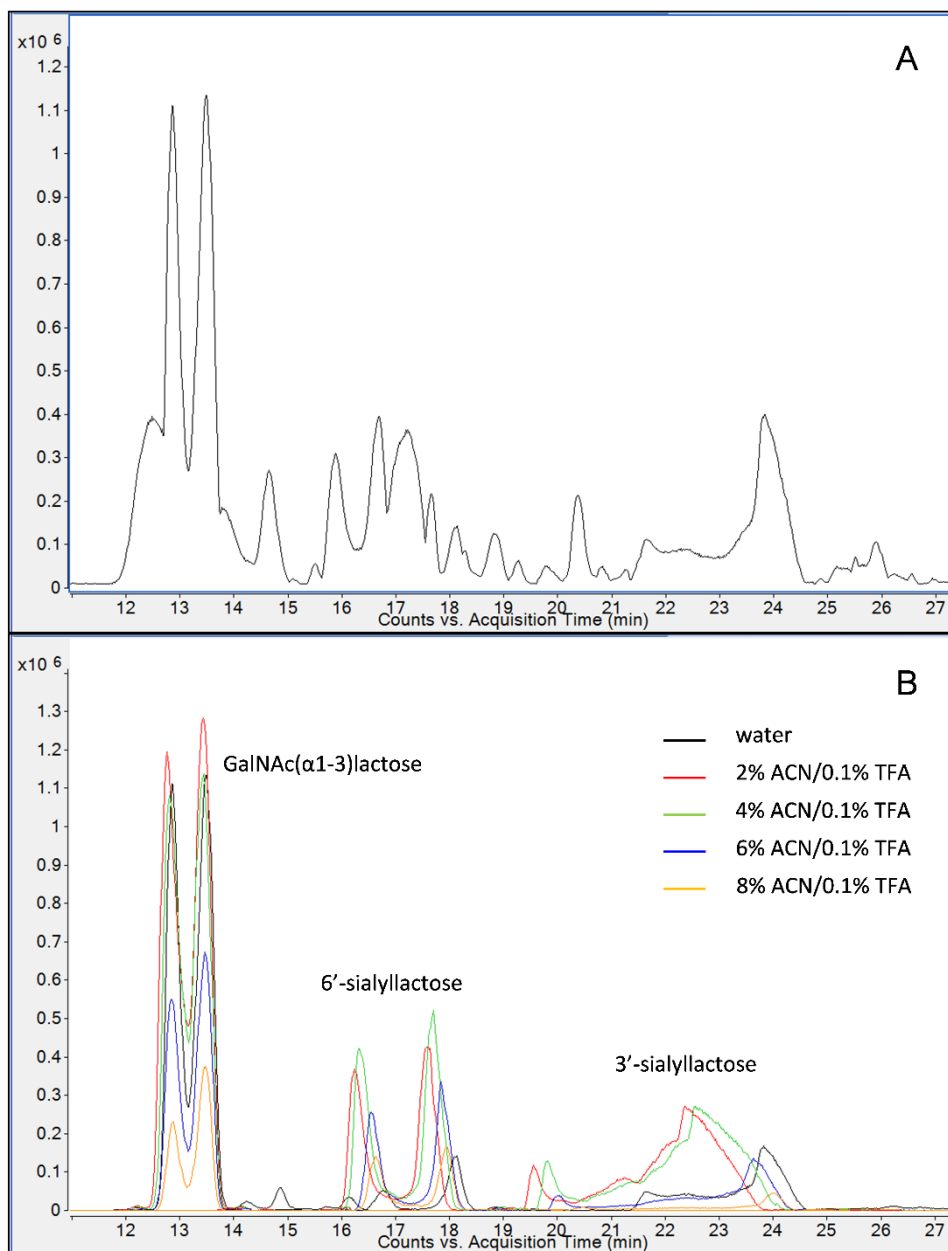

**Fig. S1.** LC-MS chromatogram of a bovine milk oligosaccharide sample (A). The effect of varying the solid phase extraction sorbent wash solution can be seen in the varying peak heights of the most abundant oligosaccharides, which are annotated in (B) as extracted ion chromatograms.
